# Supplementary material for: Multi-interface engineering of NiS/Ni3S2/Fe3O4 nanoarchitectures for use as high-efficiency electrocatalysts toward the oxygen evolution reaction
Source: Royal Society of Chemistry journal article supplement (doi:10.1039/d3qi01563g), 2023-01-01
Supplement: d3qi01563g1.pdf [file d3qi01563g1.pdf]

Electronic Supplementary Information (ESI) for Inorganic Chemistry Frontiers

## Supplementary Information

### **Constructing multi-interface engineering of NiS/Ni<sub>3</sub>S<sub>2</sub>/Fe<sub>3</sub>O<sub>4</sub> nanoarchitectures for use as high-efficiency electrocatalysts toward oxygen evolution reaction**

Chengcheng Li, Anyang Bao, Cuizhen Yang, Guoqiang Liu, Xiang Chen, Mengyue Li,

Yuwen Cheng, Dongming Liu\*

*School of Materials Science and Engineering, Anhui University of Technology, Maanshan,*

*Anhui 243002, China*

## Contents

### 1. Experimental sections

1.1 Synthesis of NP-Ni electrocatalyst

1.2 Synthesis of NP-Ni-S electrocatalyst

### 2. Figures

**Fig. S1.** Four-electron mechanism of OER on (a)  $\text{Ni}_3\text{S}_2\text{-NiS}$ , (b)  $\text{Fe}_3\text{O}_4\text{-NiS}$ , and (c)  $\text{Ni}_3\text{S}_2\text{-Fe}_3\text{O}_4$  model. (d–f) Calculated free-energy diagram of OER intermediates at zero potential ( $U=0$ ).

**Fig. S2.** Density of states of (a)  $\text{Ni}_3\text{S}_2\text{-NiS}$ , (b)  $\text{NiS-Fe}_3\text{O}_4$  and (c)  $\text{Ni}_3\text{S}_2\text{-Fe}_3\text{O}_4$ . (d) The absolute valence electrons for  $\text{Ni}_3\text{S}_2$ ,  $\text{Fe}_3\text{O}_4$ , as well as  $\text{Ni}_3\text{S}_2$  and  $\text{Fe}_3\text{O}_4$  of  $\text{Ni}_3\text{S}_2\text{-Fe}_3\text{O}_4$ . The inset represents the charge difference density of  $\text{Ni}_3\text{S}_2\text{-Fe}_3\text{O}_4$ .

**Fig. S3.** (a-b) SEM images of NP-(Fe,Ni) at different magnifications. (c) EDX mapping images of Fe, Ni and O for NP-(Fe,Ni). (d) EDX spectrum of NP-(Fe,Ni).

**Fig. S4.** SEM image of NP-(Fe,Ni)-S.

**Fig. S5.** SEM images of NP-Ni-S.

**Fig. S6.** (a-b)  $\text{N}_2$  adsorption/desorption isotherms and (c-d) pore size distribution plots of NP-(Fe,Ni) and NP-(Fe,Ni)-S.

**Fig. S7.** (a) XRD pattern of NP-(Fe,Ni). (b) Raman spectrum of NP-(Fe,Ni).

**Fig. S8.** XRD patterns of NP-(Fe,Ni)-S- $x$  with sulfurization times of 1, 3, 6, and 9 h. **Fig. S9.** Raman spectrum of NP-(Fe,Ni)-S.

**Fig. S10.** (a) XRD patterns of NP-Ni-S and NP-(Fe,Ni)-S.

**Fig. S11.** The XPS survey spectrum of NP-(Fe,Ni)-S.

**Fig. S12.** High-resolution XPS spectra of (a) Fe 2p and (b) Ni 2p for NP-(Fe,Ni) and NP-(Fe,Ni)-S.

**Fig. S13.** OER LSV curves of pristine NP-(Fe,Ni)-S-1, NP-(Fe,Ni)-S-3, NP-(Fe,Ni)-S-6, NP-(Fe,Ni)-S-9 in 1.0 M KOH electrolyte at a scan rate of  $5 \text{ mV s}^{-1}$ .

**Fig. S14.** The equivalent circuit used to fit the Nyquist plots.

**Fig. S15.** CV curves of NP-(Fe,Ni)-S, NP-(Fe,Ni), NP-Ni-S and NP-Ni at different scan rates

in the region of 0.2-0.3 V vs. RHE.

**Fig. S16.** Specific activity of NP-(Fe,Ni)-S, NP-Ni-S, NP-(Fe,Ni) and NP-Ni normalized by their corresponding ECSA.

**Fig. S17.** LSV curves before and after 3000 CV cycles of NP-(Fe,Ni)-S.

**Fig. S18.** XRD patterns of NP-(Fe,Ni)-S before and after OER test in 1.0 M KOH.

**Fig. S19.** High-resolution XPS spectra of S 2p for NP-(Fe,Ni)-S before and after OER test.

**Fig. S20.** XRD patterns of NP-Ni-S before and after OER test in 1.0 M KOH.

**Fig. S21.** SEM image of NP-Ni-S after OER test in 1.0 M KOH.

**Fig. S22.** High-resolution XPS spectra of (a) O 1s and (b) S 2p of NP-Ni-S before and after OER test in 1.0 M KOH.

**Fig. S23.** Raman spectrum of NP-Ni-S after OER test in 1.0 M KOH.

**Table S1.** Specific surface area and pore size of NP-(Fe,Ni) and NP-(Fe,Ni)-S.

**Table S2.** Comparison of OER activity of NP-(Fe,Ni)-S in 1.0 M KOH with other advanced reported non-noble metal electrocatalysts.

## 1. Experimental sections

### *1.1 Synthesis of NP-Ni electrocatalyst*

The NiAl<sub>3</sub> alloy precursor was prepared by magnetically levitated induction melting of Ni and Al strips with molar ratio of 1:3 under argon atmosphere. Then, the NiAl<sub>3</sub> ingots were ball-milled for 12 h under argon atmosphere. The nano-porous Ni (NP-Ni) was synthesized by a previous reported work via alkali-etching of the NiAl<sub>3</sub> powders under 10 wt% NaOH solution at 25 °C.

### *1.2 Synthesis of NP-Ni-S electrocatalyst*

The NP-Ni-S was synthesized through a traditional hydrothermal method by employing NP-Ni (0.1 g) powder, thiourea (3 mmol) and deionized water (60 mL) to prepare homogeneous solution. The solution was placed into a 100 ml Teflon-lined stainless-steel autoclave before kept at 150 °C for 6 h in an oven. After cool-down to room temperature, the NP-Ni-S was collected and dried at 60 °C for 12 h after filtering and washing with deionized water for several times.

## 2. Figures

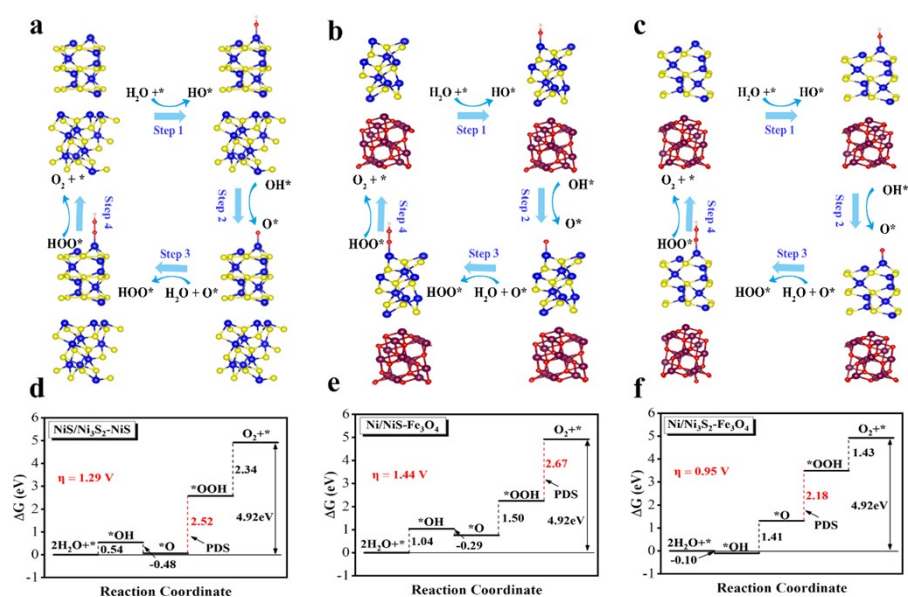

**Fig. S1.** Four-electron mechanism of OER on (a) Ni<sub>3</sub>S<sub>2</sub>-NiS, (b) Fe<sub>3</sub>O<sub>4</sub>-NiS, and (c) Ni<sub>3</sub>S<sub>2</sub>-Fe<sub>3</sub>O<sub>4</sub> model. (d-f) Calculated free-energy diagram of OER intermediates at zero potential ( $U=0$ ).

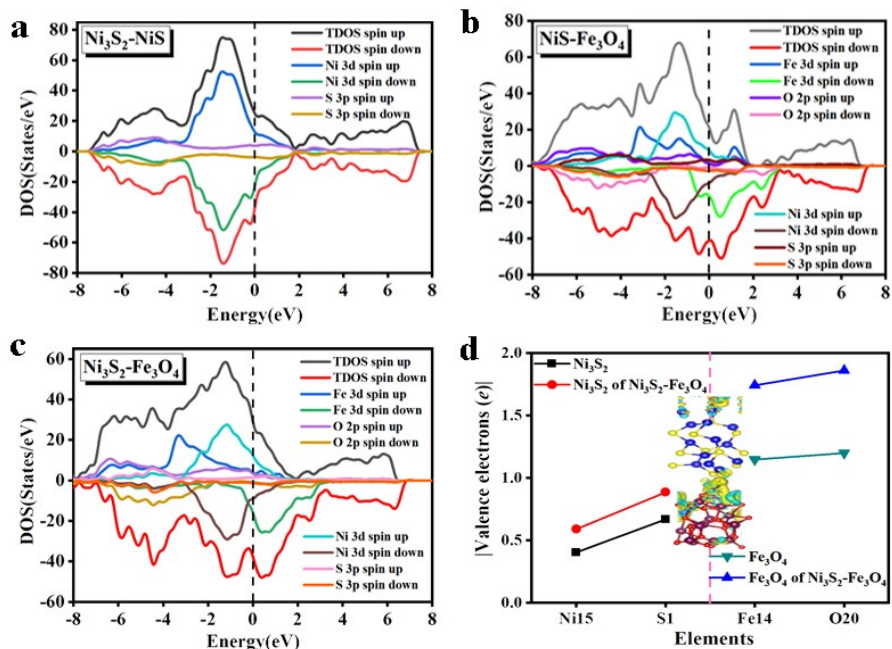

**Fig. S2.** Density of states of (a) Ni<sub>3</sub>S<sub>2</sub>-NiS, (b) NiS-Fe<sub>3</sub>O<sub>4</sub> and (c) Ni<sub>3</sub>S<sub>2</sub>-Fe<sub>3</sub>O<sub>4</sub>. (d) The absolute valence electrons for Ni<sub>3</sub>S<sub>2</sub>, Fe<sub>3</sub>O<sub>4</sub>, as well as Ni<sub>3</sub>S<sub>2</sub> and Fe<sub>3</sub>O<sub>4</sub> of Ni<sub>3</sub>S<sub>2</sub>-Fe<sub>3</sub>O<sub>4</sub>. The inset represents the charge difference density of Ni<sub>3</sub>S<sub>2</sub>-Fe<sub>3</sub>O<sub>4</sub>.

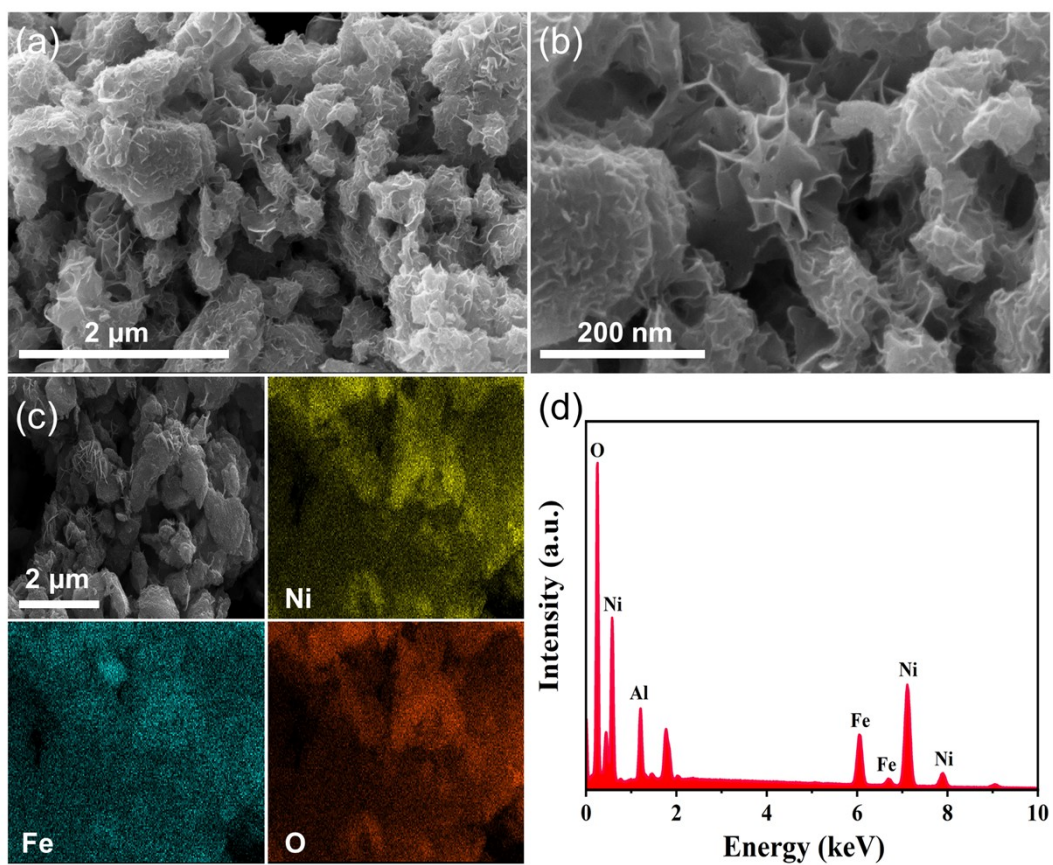

**Fig. S3.** (a-b) SEM images of NP-(Fe,Ni) at different magnifications. (c) EDX mapping images of Fe, Ni and O for NP-(Fe,Ni). (d) EDX spectrum of NP-(Fe,Ni).

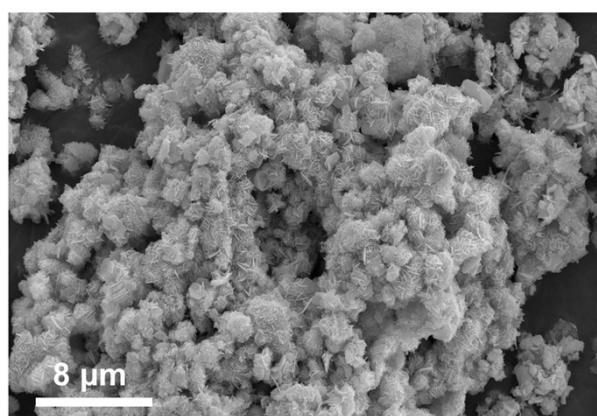

**Fig. S4.** SEM image of NP-(Fe,Ni)-S.

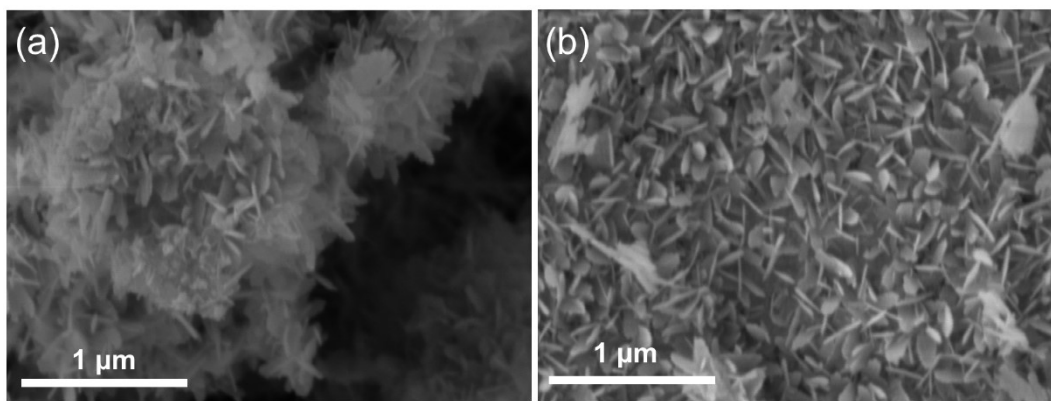

**Fig. S5.** SEM images of NP-Ni-S.

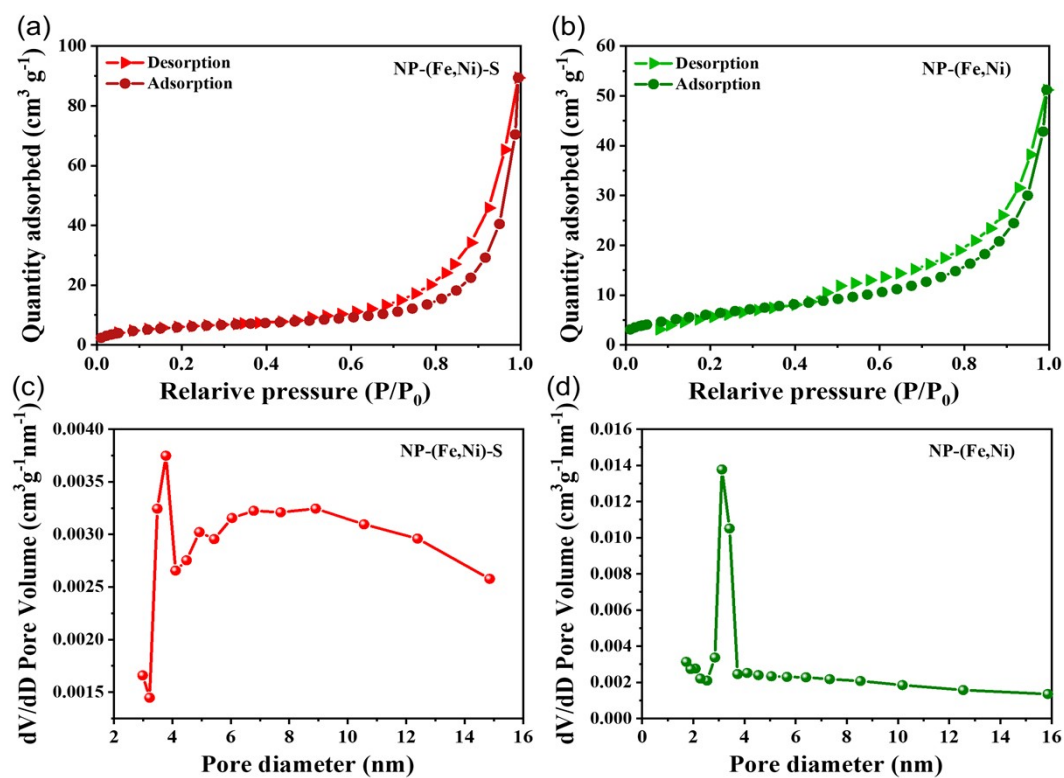

**Fig. S6.** (a-b)  $\text{N}_2$  adsorption/desorption isotherms and (c-d) pore size distribution plots of NP-(Fe,Ni) and NP-(Fe,Ni)-S.

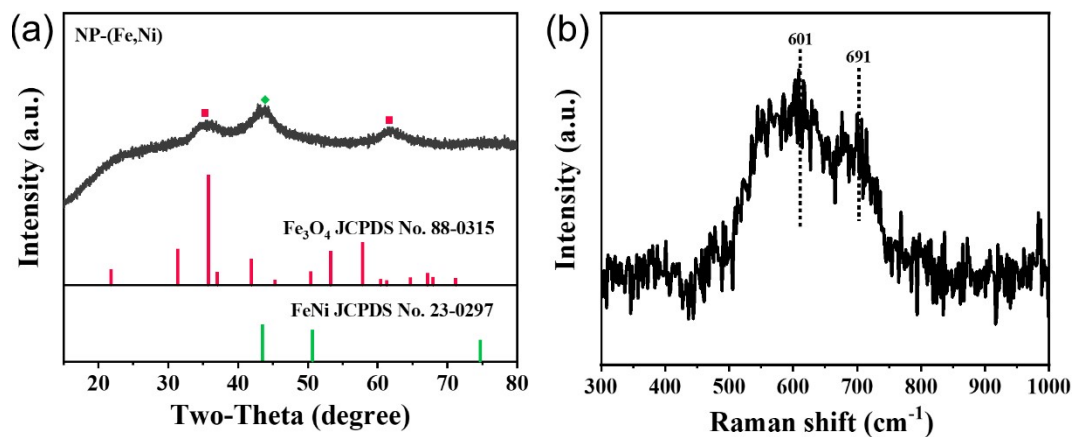

Fig. S7. (a) XRD pattern of NP-(Fe,Ni). (b) Raman spectrum of NP-(Fe,Ni).

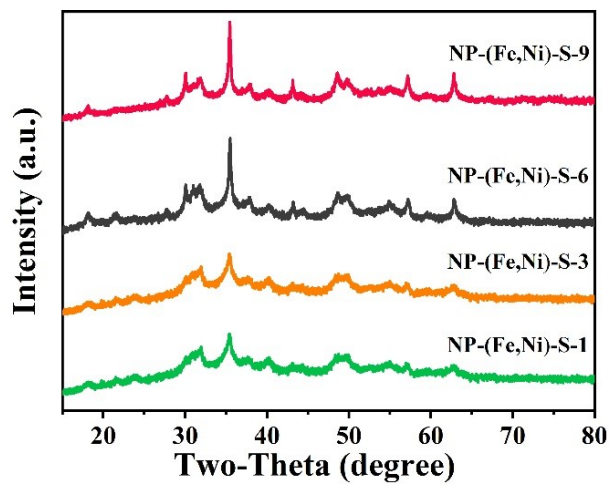

Fig. S8. XRD patterns of NP-(Fe,Ni)-S-*x* with sulfurization times of 1, 3, 6, and 9 h.

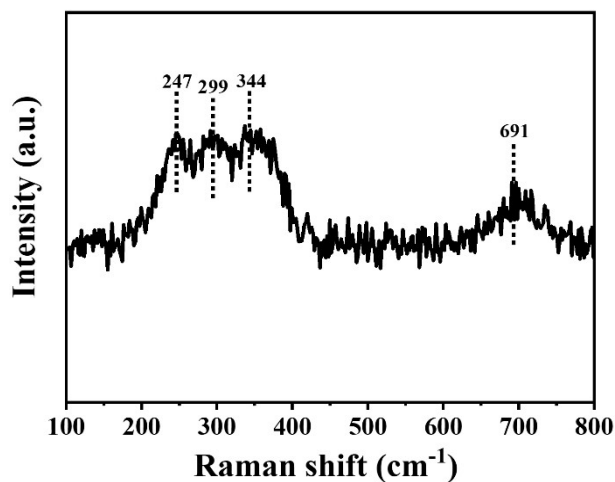

Fig. S9. Raman spectrum of NP-(Fe,Ni)-S.



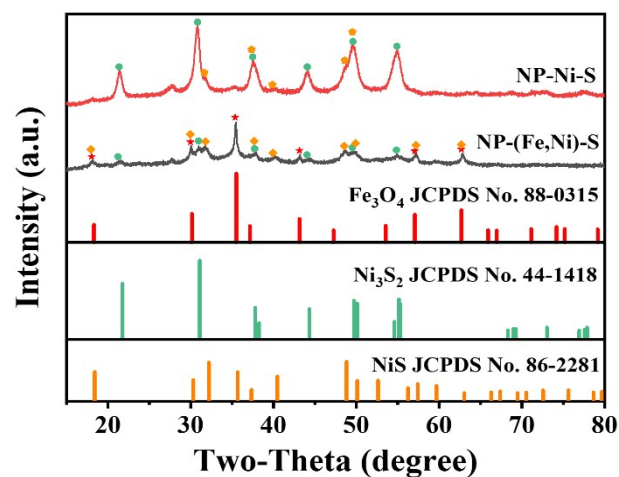

Fig. S10. (a) XRD patterns of NP-Ni-S and NP-(Fe,Ni)-S.

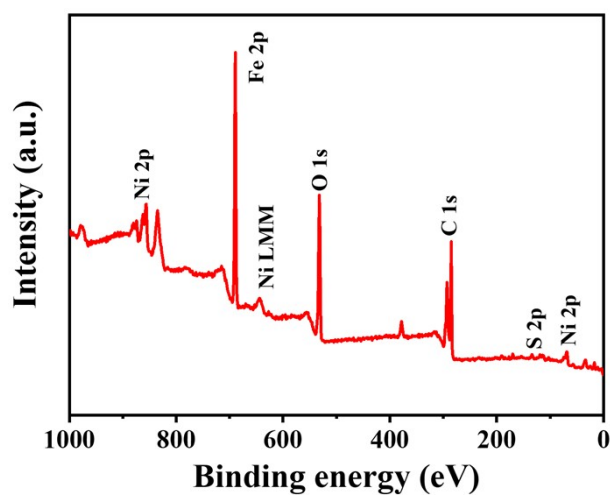

Fig. S11. The XPS survey spectrum of NP-(Fe,Ni)-S.

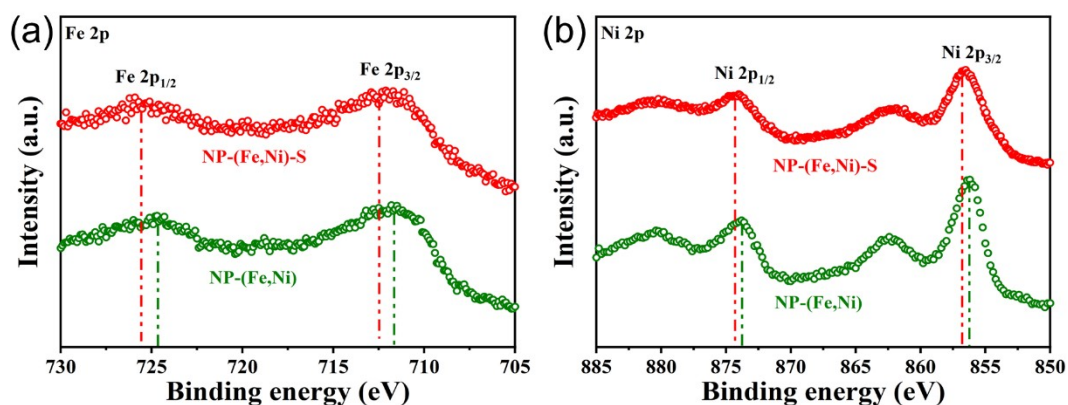

Fig. S12. High-resolution XPS spectra of (a) Fe 2p and (b) Ni 2p for NP-(Fe,Ni) and NP-(Fe,Ni)-S.

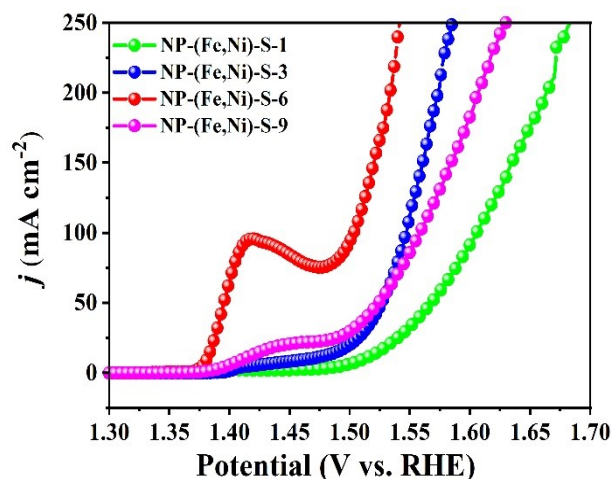

**Fig. S13.** OER LSV curves of pristine NP-(Fe,Ni)-S-1, NP-(Fe,Ni)-S-3, NP-(Fe,Ni)-S-6, NP-(Fe,Ni)-S-9 in 1.0 M KOH electrolyte at a scan rate of  $5 \text{ mV s}^{-1}$ .

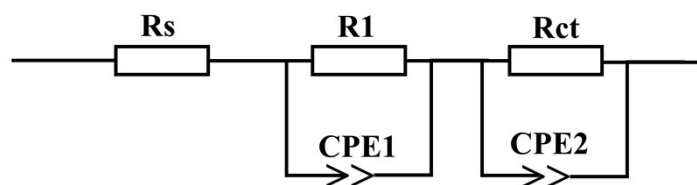

**Fig. S14.** The equivalent circuit used to fit the Nyquist plots.

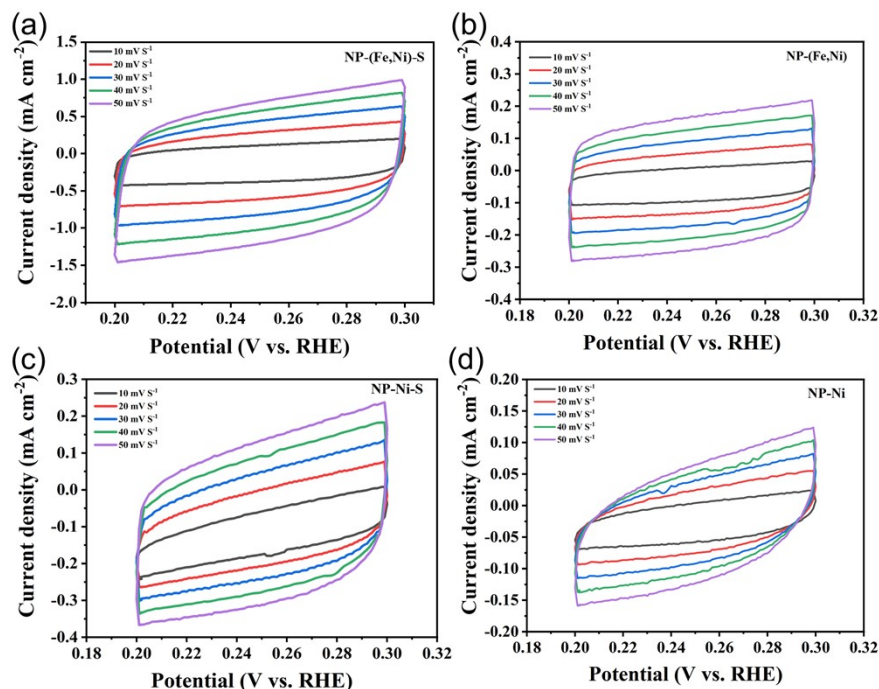

**Fig. S15.** CV curves of NP-(Fe,Ni)-S, NP-(Fe,Ni), NP-Ni-S and NP-Ni at different scan rates in the region of 0.2-0.3 V vs. RHE.

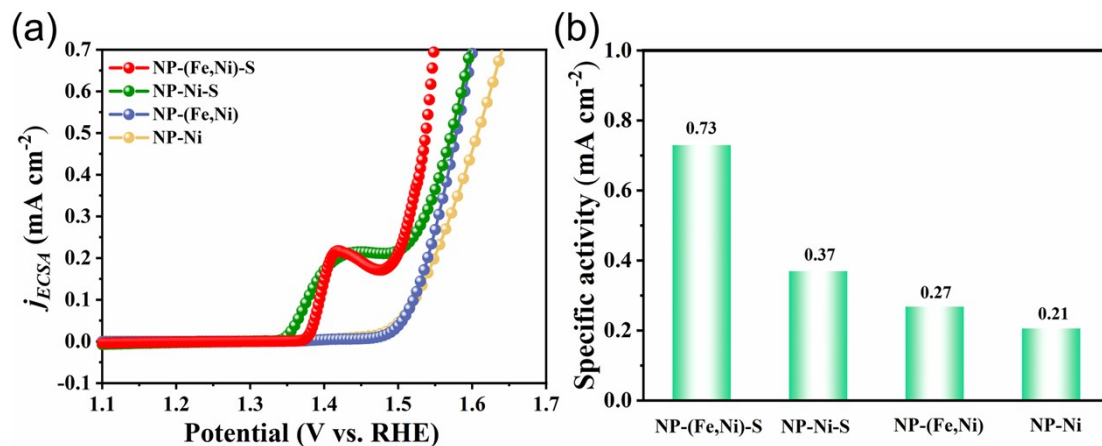

**Fig. S16.** Specific activity of NP-(Fe,Ni)-S, NP-Ni-S, NP-(Fe,Ni) and NP-Ni normalized by their corresponding ECSA.

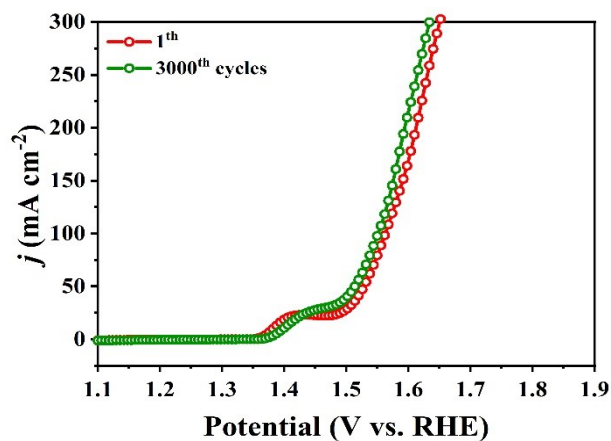

**Fig. S17.** LSV curves before and after 3000 CV cycles of NP-(Fe,Ni)-S.

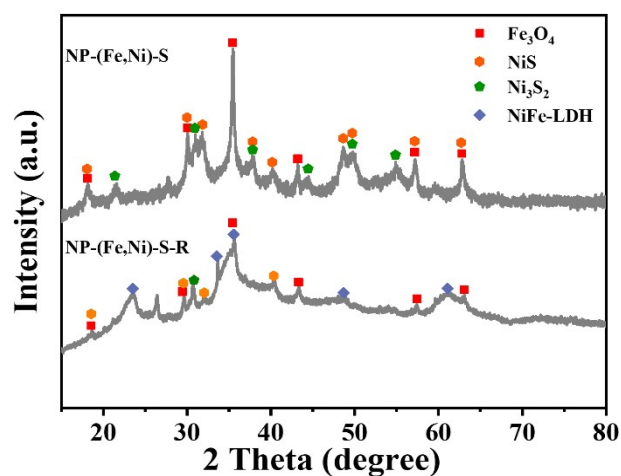

**Fig. S18.** XRD patterns of NP-(Fe,Ni)-S before and after OER test in 1.0 M KOH.

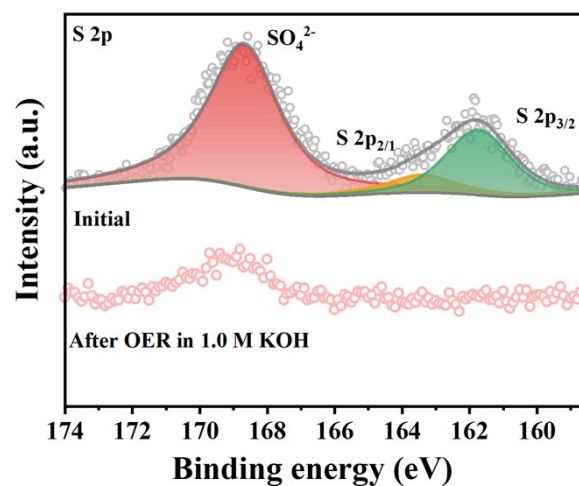

**Fig. S19.** High-resolution XPS spectra of S 2p for NP-(Fe,Ni)-S before and after OER test.

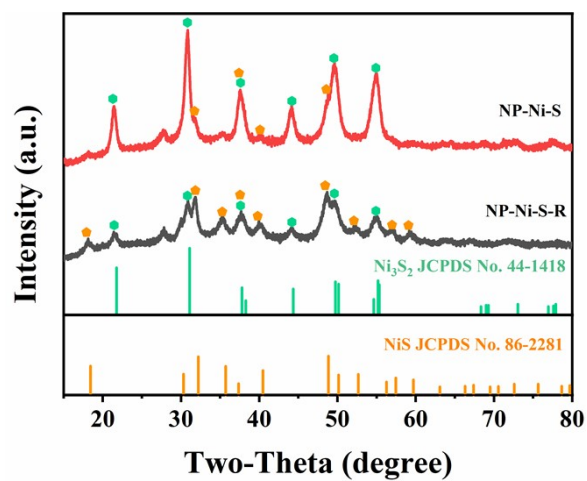

**Fig. S20.** XRD patterns of NP-Ni-S before and after OER test in 1.0 M KOH.

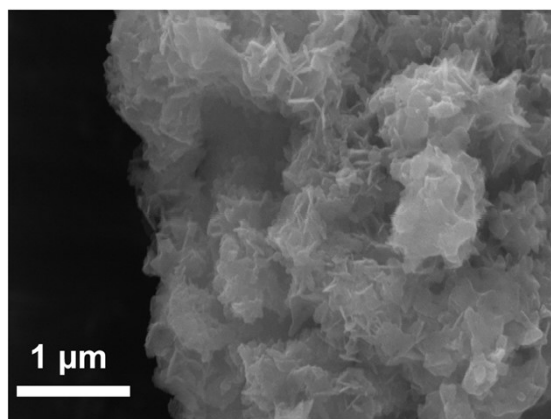

**Fig. S21.** SEM image of NP-Ni-S after OER test in 1.0 M KOH.

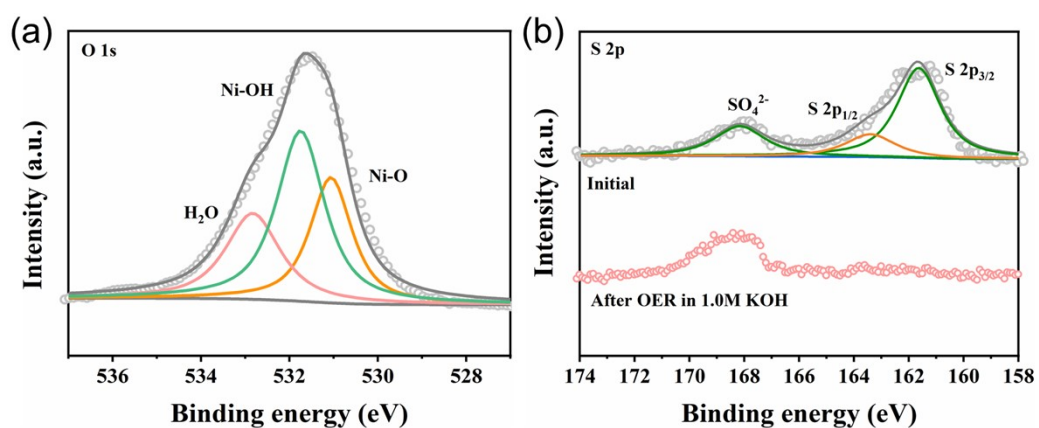

**Fig. S22.** High-resolution XPS spectra of (a) O 1s and (b) S 2p of NP-Ni-S before and after OER test in 1.0 M KOH.

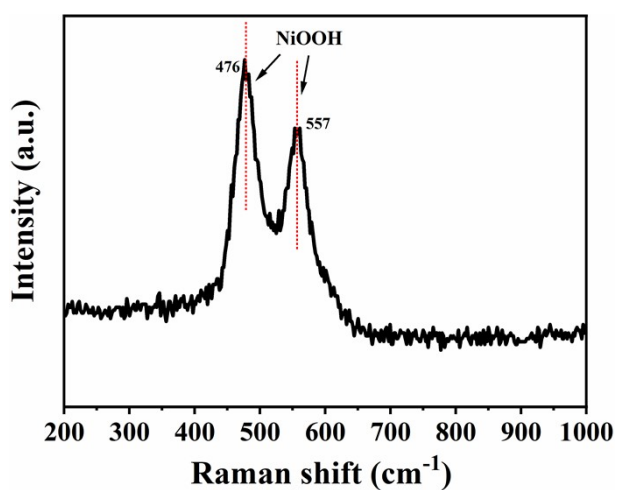

**Fig. S23.** Raman spectrum of NP-Ni-S after OER test in 1.0 M KOH.

**Table S1.** Specific surface area and pore size of NP-(Fe,Ni) and NP-(Fe,Ni)-S.

| Samples      | Specific surface area ( $\text{m}^2 \text{g}^{-1}$ ) | Pore size (nm) |
|--------------|------------------------------------------------------|----------------|
| NP-(Fe,Ni)   | 23.4                                                 | 5.3            |
| NP-(Fe,Ni)-S | 21.3                                                 | 8.3            |

**Table S2.** Comparison of OER activity of NP-(Fe,Ni)-S in 1.0 M KOH with other advanced reported non-noble metal electrocatalysts.

| Catalysts                                            | Overpotential (mV) at $100 \text{ mA cm}^{-2}$ | Ref.      |
|------------------------------------------------------|------------------------------------------------|-----------|
| NP-(Fe,Ni)-S                                         | 274                                            | This work |
| Ni-Fe/NiMoN <sub>x</sub>                             | 292                                            | 1         |
| NiMoN/NF-450                                         | 370                                            | 2         |
| Ni/NiFeMoO <sub>x</sub> /NF                          | 289                                            | 3         |
| Ni <sub>2</sub> P-VP <sub>2</sub> /NF                | 398                                            | 4         |
| MoO <sub>x</sub> /Ni <sub>3</sub> S <sub>2</sub> /NF | 310                                            | 5         |
| Pd/NiFeO <sub>x</sub>                                | 296                                            | 6         |
| NiS/NiS <sub>2</sub>                                 | 416                                            | 7         |
| ZnP@Ni <sub>2</sub> P-NiSe <sub>2</sub>              | 326                                            | 8         |
| Fe-Ni <sub>2</sub> P@Cu <sub>x</sub> S               | 390                                            | 9         |
| NiCo <sub>2</sub> S <sub>4</sub>                     | 399                                            | 10        |
| NiFe-LDH                                             | 302                                            | 11        |
| Ni <sub>3</sub> FeN/r-Go                             | 320                                            | 12        |

## References

- 1 Y. Qiu, M. Sun, J. Cheng, J. Sun, D. Sun, L. Zhang, Bifunctional Ni-Fe/NiMoN<sub>x</sub> nanosheets on Ni foam for high-efficiency and durable overall water splitting, *Catal. Commun.*, 2022, **164**, 106426.
- 2 Y. Wang, Y. Sun, F. Yan, C. Zhu, P. Gao, X. Zhang, Y. Chen, Self-supported NiMo-based nanowire arrays as bifunctional electrocatalysts for full water splitting, *J. Mater. Chem. A.*, 2018, **6**, 8479-8487.
- 3 Y. Li, G. Zhang, W. Lu, F. Cao, Amorphous Ni-Fe-Mo suboxides coupled with Ni network as porous nanoplate array on nickel foam: A highly efficient and durable bifunctional electrode for overall water splitting, *Adv. Sci.*, 2020, **7**, 1902034.
- 4 H. Yan, Y. Xie, A. Wu, Z. Cai, L. Wang, C. Tian, X. Zhang, H. Fu, Anion-modulated HER and OER activities of 3D Ni-V-based interstitial compound heterojunctions for high-efficiency and stable overall water splitting, *Adv. Mater.*, 2019, **31**, 1901174.
- 5 Y. Wu, G. Li, Y. Liu, L. Yang, X. Lian, T. Asefa, X. Zou, Overall water splitting catalyzed efficiently by an ultrathin nanosheet-built, hollow Ni<sub>3</sub>S<sub>2</sub>-based electrocatalyst, *Adv. Funct. Mater.*, 2016, **26**, 4839-4847.
- 6 W. Zhang, X. Jiang, Z. Dong, J. Wang, N. Zhang, J. Liu, G. Xu, L. Wang. Porous Pd/NiFeO<sub>x</sub> nanosheets enhance the pH-universal overall water splitting, *Adv. Funct. Mater.*, 2021, **31**, 2107181.
- 7 Q. Li, D. Wang, C. Han, X. Ma, Qi. Lu, Z. Xing, X. Yang, Construction of amorphous interface in an interwoven NiS/NiS<sub>2</sub> structure for enhanced overall water splitting, *J.*

- Mater. Chem. A.*, 2018, **6**, 8233-8237.
- 8 K. Chang, D. T. Tran, J. Wang, S. Prabhakaran, D.H. Kim, N.H. Kim, J.H. Lee, Atomic heterointerface engineering of Ni<sub>2</sub>P-NiSe<sub>2</sub> nanosheets coupled ZnP-based arrays for high efficiency solar-assisted water splitting, *Adv. Funct. Mater.*, 2022, 2113224.
  - 9 D.T. Tran, H.T. Le, V.H. Hoa, N.H. Kim, J.H. Lee, Dual-coupling ultrasmall iron-Ni<sub>2</sub>P into P-doped porous carbon sheets assembled Cu<sub>x</sub>S nanobrush arrays for overall water splitting, *Nano Energy*, 2021, **84**, 105861.
  - 10 G. Janani, S. Yuvaraj, S. Surendran, Y. Chae, Y. Sim, S. Song, W. Park, M. Kim, U. Sim, Enhanced bifunctional electrocatalytic activity of Ni-Co bimetallic chalcogenides for efficient water-splitting application, *J. Alloys Compd.*, 2020, **846**, 156389.
  - 11 X. Wang, Y. Tuo, Y. Zhou, D. Wang, S. Wang, J. Zhang, Ta-doping triggered electronic structural engineering and strain effect in NiFe LDH for enhanced water oxidation, *Chem. Eng. J.*, 2021, **403**, 126297.
  - 12 Y. Gu, S. Chen, J. Ren, Y. Jia, C. Chen, S. Komarneni, D. Yang, X. Yao, Electronic structure tuning in Ni<sub>3</sub>FeN/r-GO aerogel toward bifunctional electrocatalyst for overall water splitting, *ACS Nano*, 2018, **12**, 245-253.
